# Supplementary material for: A novel lineage-tracing mouse model for studying early MmuPV1 infections
Source: eLife. 2022 May 9;11:e72638. doi: 10.7554/eLife.72638 (PMC9084889; doi:10.7554/eLife.72638)
Supplement: Figure 4—source data 1. [file elife-72638-fig4-data1.xlsx]

## Sheet: Numbers
		Cells/Singlets/YFP+ Cells | Count			Cells/Singlets/YFP/YFP+ Ki67+ Cells | Count			Cells/Singlets/YFP/YFP+ MHC-I+ Cells | Count			Cells/Singlets/YFP- Cells | Count			Cells/Singlets/YFP-/YFP- Ki-67+ Cells | Count			Cells/Singlets/YFP-/YFP- MHC-I+ Cells | Count
Mock 1 d0		33.1439			0			7.89141			1136.36			11.048			55.2399
Mock 2 d0		47.3623			5.00578			5.7759			1206.78			3.8506			59.2992
Mock 3 d0		30.9201			5.27903			13.5747			2229.26			4.52489			162.896
Cre 1 d0		23.2362			4.22476			18.3073			1992.68			23.9403			67.5961
Cre 2 d0		18.6178			2.97885			8.93655			2097.11			11.9154			54.364
Cre 3 d0		22.2913			2.02648			2.02648			1699.54			39.1786			12.1589
MusPV 1 d0		151.575			8.60471			115.833			6249.67			131.056			385.226
MusPV 2 d0		62.201			6.37959			7.97448			4338.12			46.252			115.63
MusPV 3 d0		60.5886			4.32776			43.9988			3969.99			47.6053			230.092
Cre 1 d5		61.6037			13.1287			50.4948			418.097			1.0099			59.5839
Cre 2 d5		55.7736			12.3941			46.478			201.405			2.06569			50.6094
Cre 3 d5		115.987			23.1974			87.9567			1084.48			6.7659			117.92
MusPV 1 d5		1074.04			616.271			56.5285			1207.05			3.32521			21.0596
MusPV 2 d5.		686.599			418.341			72.087			1206.57			1.18175			77.9957
MusPV 3 d5		294.314			152.155			95.5131			366.504			1.11062			36.6504
Cre 1 d10		550.743			182.55			315.594			3879.95			4.12541			813.738
Cre 2 d10		413.306			105.847			256.048			4230.85			2.01613			748.992
Cre 3 d10		146.566			34.5477			92.1273			787.27			1.0469			190.536
MusPV 1 d10		281.303			34.8985			237.944			1251.06			2.11506			322.547
MusPV 2 d10		360.901			149.411			101.01			2165.4			5.26094			234.638
MusPV 3 d10		173.741			48.8972			114.44			548.273			4.16146			132.127
Cre 1 d30		222.707			32.3817			177.108			6032.25			29.0775			410.389
Cre 2 d30		437.861			71.6658			329.488			9830.45			73.4137			735.011
Cre 3 d30		124.822			13.8226			103.879			3269.67			7.53958			243.78
MusPV1 1 d30		114.178			25.9176			81.2553			2457.27			8.40572			150.602
MusPV1 2 d30		246.423			55.6439			173.291			4141.49			12.7186			320.35
MusPV1 3 d30		93.2082			22.8132			66.4842			1582.58			3.91083			129.057

## Sheet: Percentages
		YFP+		YFP+ Ki-67+		YFP- Ki-67+		YFP+ MHC-I+		YFP- MHC-I+
Cre 1 d0		1.62		16		1.2		78.8		12.3
Cre 2 d0		2.32		9.09		0.57		48		5.33
Cre 3 d0		2.06		18.2		2.31		9.09		11.6
MusPV 1 d0		2.49		10.3		2.1		76.4		6.78
MusPV 2 d0		2.66		7.14		1.07		12.8		5.18
MusPV 3 d0		4.06		5.68		1.2		72.6		1.43
Cre 1 d5		16.6		22.2		0.24		82		14.3
Cre 2 d5		8.78		20		1.03		83.3		25.1
Cre 3 d5		11.3		21.3		0.62		75.8		10.9
MusPV 1 d5		28.1		60.9		0.28		5.26		1.74
MusPV 2 d5		37		51.7		0.098		10.5		6.46
MusPV 3 d5		31.9		57.4		0.3		32.5		10
Cre 1 d10		8.55		25.6		0.11		57.3		21
Cre 2 d10		14.4		23.6		0.048		62		17.7
Cre 3 d10		11.9		33.1		0.13		62.9		24.2
MusPV 1 d10		14.1		41.4		0.17		84.6		25.8
MusPV 2 d10		22		28.1		0.24		28		10.8
MusPV 3 d10		16.8		12.4		0.76		65.9		24.1
Cre 1 d30		7.76		16.4		0.48		79.5		13.6
Cre 2 d30		6.82		11.1		0.75		75.2		15
Cre 3 d30		6.61		14.5		0.23		83.2		14.9
MusPV1 1 d30		10.2		22.6		0.34		71.2		12.3
MusPV1 2 d30		10		22.7		0.31		70.3		15.5
MusPV1 3 d30		8.27		24.5		0.25		71.3		16.3
